# Supplementary material for: The potency of the fs260 connexin43 mutant to impair keratinocyte differentiation is distinct from other disease-linked connexin43 mutants
Source: PubMed Central journal article supplement — Biochem J. 2010 Jul 14;429(Pt 3):473–83. doi: 10.1042/BJ20100155 (PMC2907710; doi:10.1042/bj20100155), 2010-07-14
Supplement: bj4290473add.pdf [file bj4290473add.pdf]

SUPPLEMENTARY ONLINE DATA

The potency of the fs260 connexin43 mutant to impair keratinocyte differentiation is distinct from other disease-linked connexin43 mutants

Jared M. CHURKO, Stephanie LANGLOIS, Xinyue PAN, Qing SHAO and Dale W. LAIRD<sup>1</sup>

Department of Anatomy and Cell Biology, University of Western Ontario, London, Ontario, Canada N6A 5C1

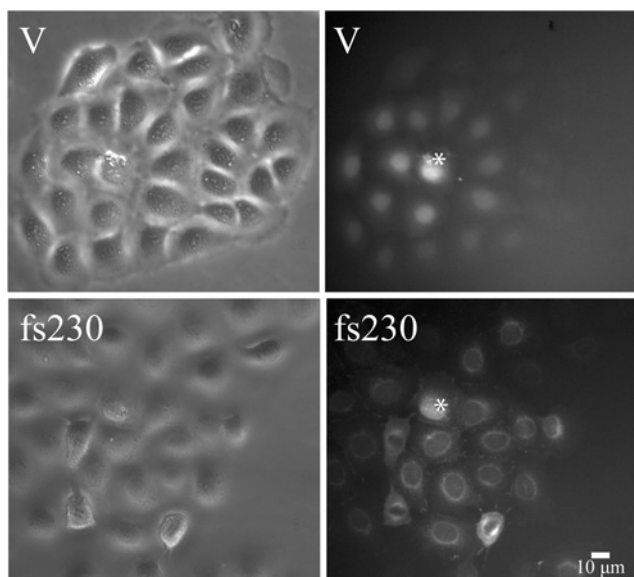

**Figure S1** Microinjection of Lucifer Yellow into vector control and fs230-expressing REKs

A single cell was microinjected with Lucifer Yellow (asterisks) in either vector or fs230-mutant-expressing REKs. Lucifer Yellow was found to readily transfer to neighbouring cells in only the vector control cells. Phase-contrast (left panels) and fluorescent (right panels) images were acquired to visualize cell clusters and Lucifer Yellow dye transfer. Note that the GFP-tagged fs230 mutant was also detected in the fluorescent image.

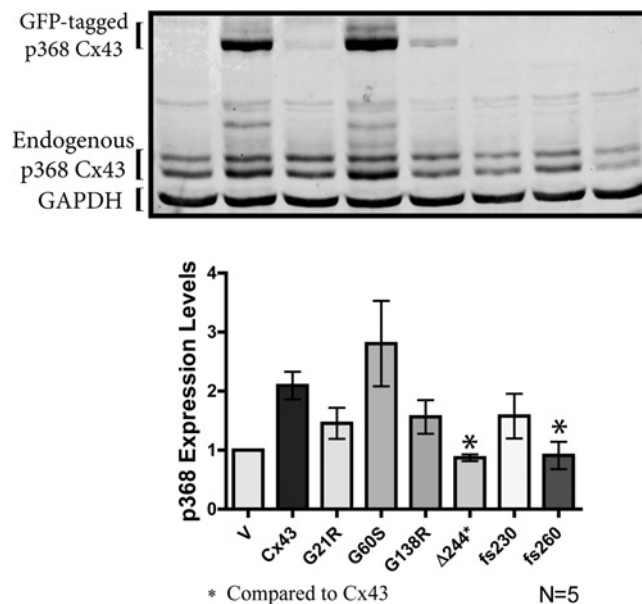

**Figure S2** Western blot and quantification of the endogenous p368 phosphorylated species of Cx43

Western blots revealed a significant decrease in the p368 levels of Cx43 in both the fs260 and Δ244\* cells when compared with full-length Cx43-expressing REKs. \**P* < 0.05.

Received 27 January 2010/19 May 2010; accepted 1 June 2010  
 Published as BJ Immediate Publication 1 June 2010, doi:10.1042/BJ20100155

<sup>1</sup> To whom correspondence should be addressed (email dale.laird@schulich.uwo.ca).
